# Supplementary material for: IFN-Gamma and TNF-Alpha as a Priming Strategy to Enhance the Immunomodulatory Capacity of Secretomes from Menstrual Blood-Derived Stromal Cells
Source: MDPI journal article supplement (doi:10.3390/ijms222212177), 2021-11-10
Supplement: s1 [file s1]

## **Supplementary Materials**

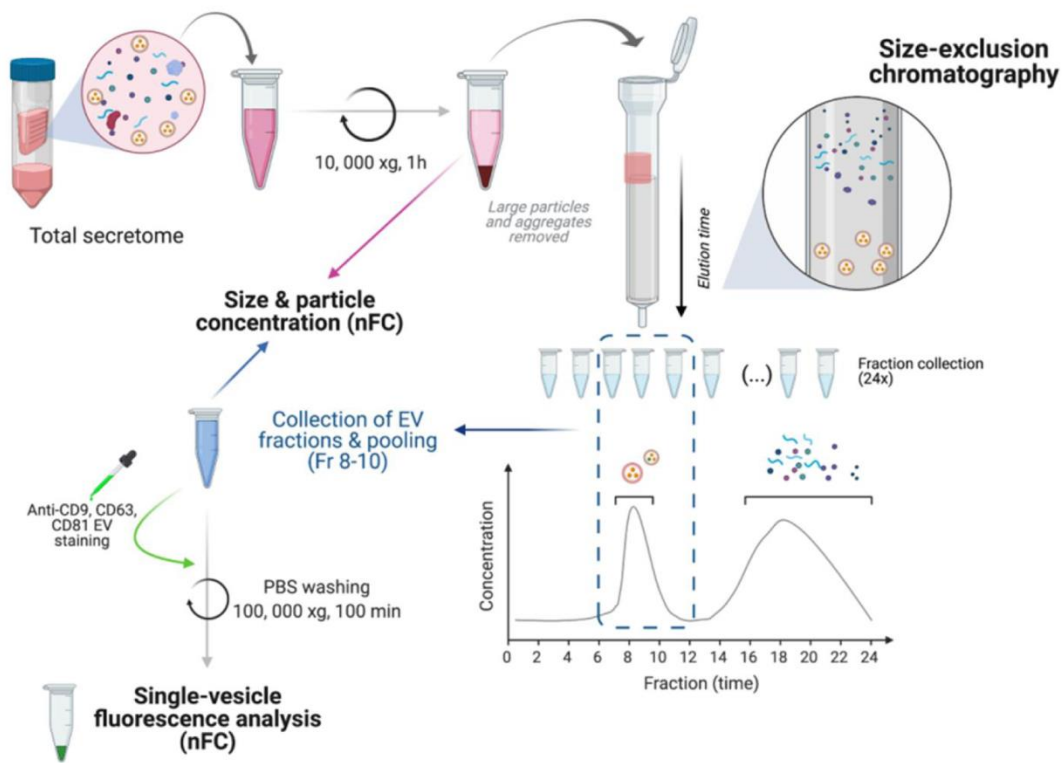

**Figure S1. Methodological workflow for the analysis of the EVs compartment in MenSC secretomes.** Total secretome samples were centrifuged at  $10,000 \times g$  for 1 h to remove large particles and aggregates. In the following, size and particle concentration were determined by nFC. To enrich the EVs and to separate them from the soluble protein fraction, size-exclusion chromatography (SEC) was performed. A total of 24 fractions were collected in which EVs were enriched in fractions 8–10. EV fractions were pooled and size and particle concentration were again measured by nFC. Finally, EV pools (similar number of particles between conditions) were stained with anti-CD9, CD63, and CD81 FITC-coupled antibodies. Before analyses, the non-labeled antibody was removed by PBS washing and centrifugation at  $100,000 \times g$  for 2 h, at  $4^\circ\text{C}$ . Stained EV-pellets were suspended in PBS and analyzed by nFC according to the manufacturer's instructions. This figure has been created with BioRender (<https://app.biorender.com/>).

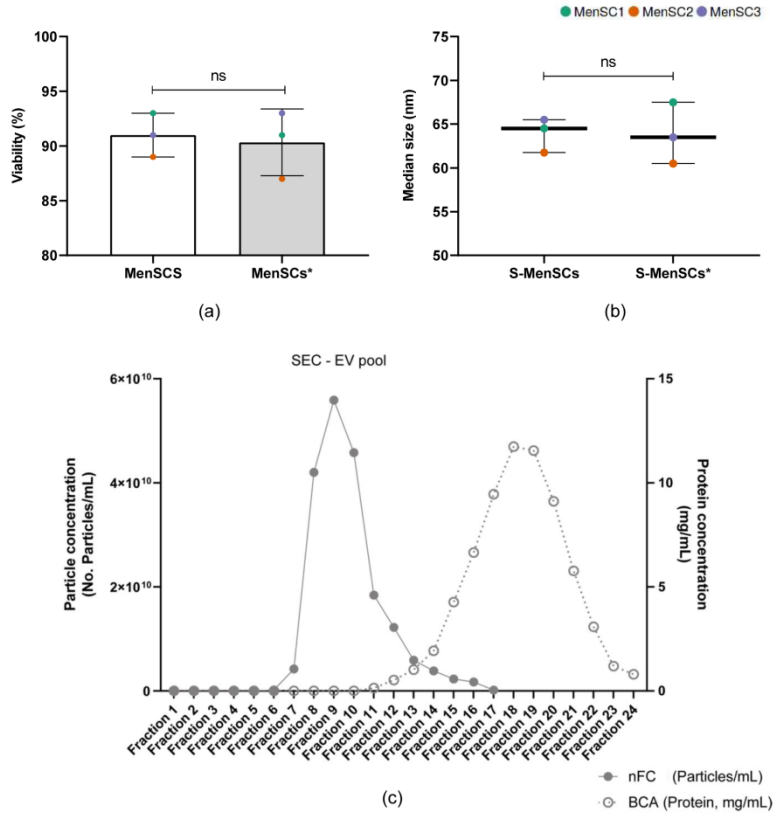

**Figure S2. Additional data on MenSC-derived EVs.** (a) Cell viability was checked by Trypan Blue Staining for MenSCs (white bars) and MenSCs\* (grey bars) since total cell number was used as normalizer for EV release estimation. No significant differences were found. (b) nFC analyses of total secretomes (10k × g supernatants) showed that the median size (nm) of detected particles was similar between basal (S-MenSCs) and primed samples (S-MenSCs\*). Data from different donors (MenSC1, MenSC2, MenSC3) are indicated with different colors. (c) Representative plot of SEC fractions. A total of 24 fractions were collected. The left axis indicates the particle concentration detected by nFC (continuous line) and the right axis shows the protein concentration (mg/ml) detected by BCA (discontinuous line) for each fraction.

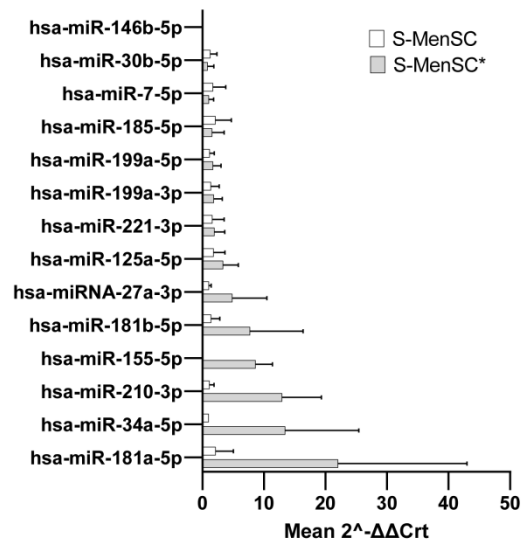

**Figure S3. Confirmation of miRNA expression.** A total of 14 miRNAs directly involved in the Inflammatory Response were selected to confirm the expression result of NGS analysis by qPCR. Total RNA was isolated from S-MenSCs and S-MenSCs\* and the amplification products were analyzed by the  $2^{-\Delta\Delta C_{rt}}$  method using the most stables miRNAs as endogenous controls. The figure indicates the mean  $2^{-\Delta\Delta C_{rt}}$  values of miRNA expression from S-MenSCs (white bars) and S-MenSCs\* (grey bars). No statistical differences were found.

| Antigen   | Alternative Name                                                                                                                                   | Clone     | Catalog number<br>(Company)   |
|-----------|----------------------------------------------------------------------------------------------------------------------------------------------------|-----------|-------------------------------|
| CD9       | p24, DRAP-1, MRP-1                                                                                                                                 | M-L13     | 341646<br>(BD Pharmingen)     |
| CD16      | FCRIIIA, CD16a                                                                                                                                     | LNK16     | MCA1193F<br>(Bio-Rad)         |
| CD20      | B1, Bp35                                                                                                                                           | L27       | 335829<br>(BD Pharmingen)     |
| CD29      | Platelet GPIIa, Integrin $\beta$ 1, GP                                                                                                             | 4B7R      | MCA1949F<br>(Bio-Rad)         |
| CD38      | ADP-ribosyl cyclase, T10, Cyclic ADP-ribose hydrolase 1                                                                                            | AT13/5    | MCA1019F<br>(Bio-Rad)         |
| CD44      | ECMR11, H-CAM, Pgp-1, Phagocytic glycoprotein I, Extracellular matrix receptor III, GP90 Lymphocyte homing/adhesion receptor, Hyaluronate receptor | Clone 515 | 550989<br>(BD Pharmingen)     |
| CD48      | Blast-1, Hulym3, BCM-1, OX-45, MEM-102                                                                                                             | MEM-102   | MCA1053<br>(Bio-Rad)          |
| CD49a     | VLA-1 $\alpha$ , Integrin $\alpha$ 1                                                                                                               | SR84      | 559596<br>(BD Pharmingen)     |
| CD49b     | VLA-2 $\alpha$ , Integrin $\alpha$ 2, gPIa                                                                                                         | AK7       | MCA743F<br>(Bio-Rad)          |
| CD49c     | VLA-3 $\alpha$ , Integrin $\alpha$ 3, GAPB3, Galactoprotein B3, MSK18, Very Common Antigen-2 (VCA-2)                                               | 17C6      | MCA1948F<br>(Bio-Rad)         |
| CD49d     | VLA-4 $\alpha$ , Integrin $\alpha$ 4                                                                                                               | 44H6      | MCA923F<br>(Bio-Rad)          |
| CD49e     | VLA-5 $\alpha$ , Integrin $\alpha$ 5, Fibronectin receptor                                                                                         | JBS5      | MCA1187T<br>(Bio-Rad)         |
| CD49f     | VLA-6 $\alpha$ , Integrin $\alpha$ 6, gpl                                                                                                          | 450-30A   | MCA1457F<br>(Bio-Rad)         |
| CD50      | ICAM-3                                                                                                                                             | ICAM3.3   | MCA1485<br>(Bio-Rad)          |
| CD51      | Integrin $\alpha$ v, VNR- $\alpha$ , Vitronectin-R $\alpha$                                                                                        | 13C2      | 9656-09<br>(Southern Biotech) |
| CD54      | ICAM-1                                                                                                                                             | 15.2      | MCA1615F<br>(Bio-Rad)         |
| CD55      | Decay Accelerating Factor for Complement (DAF) S                                                                                                   | 67        | MCA1614<br>(Bio-Rad)          |
| CD56      | Leu-19, NKH-1, Neural Cell Adhesion Molecule (NCAM)                                                                                                | B159      | 555516<br>(BD Pharmingen)     |
| CD58      | LFA-3                                                                                                                                              | B-L28     | 854.632.010<br>(DIAclone)     |
| CD59      | 1F5Ag, H19, Protectin, MAC1F, M1RL, P-18                                                                                                           | BRA10G    | 5590-F100T<br>(BIOCYTEX)      |
| CD61      | GP IIIa, Integrin $\beta$ 3                                                                                                                        | PM6/13    | MCA728F<br>(Bio-Rad)          |
| CD62E     | E-Selectin, ELAM-1, LECAM-2                                                                                                                        | CL2/6     | MCA1969F<br>(Bio-Rad)         |
| CD63      | LIMP, MLA1, gp55, NGA, LAMP-3, ME491, OMA81H, TSPAN30, Granulophysin, Melanoma 1 antigen                                                           | H5C6      | 557305<br>(BD Pharmingen)     |
| CD66a/c/e | CD66, NCA-160, BGP (Biliary glycoprotein), BGPI, BGPI, CEACAM1, NCA, NCA-50/90, CEAL, CEACAM6                                                      | B1.1/CD66 | 551480<br>(BD Pharmingen)     |
| CD71      | TFRC, T9, Transferrin receptor, TFR, TRFR                                                                                                          | DF1513    | MCA1148F<br>(Bio-RAD)         |
| CD73      | Ecto-5'-nucleotidase, NT5E, E5NT, NT5, NTE, eN, eNT                                                                                                | AD2       | 550257<br>(BD Pharmingen)     |
| CD90      | Thy-1                                                                                                                                              | F15-42-1  | MCA90F<br>(Bio-Rad)           |

|                           |                                                                                     |         |                                  |
|---------------------------|-------------------------------------------------------------------------------------|---------|----------------------------------|
| <b>CD105</b>              | Endoglin, HHT1, ORW, SH-2                                                           | SN6     | MCA1557<br>(Bio-Rad)             |
| <b>CD107a</b>             | LAMP-1, LAMPA, CD107a, LGP120                                                       | H4A3    | A15798<br>(Thermo Fisher)        |
| <b>CD120b</b>             | TNFR1I, p75, TNFR p80                                                               | MR2-1   | MCA1944<br>(Bio-Rad)             |
| <b>CD126</b>              | IL-6R $\alpha$                                                                      | M5      | 551850<br>(BD Pharmingen)        |
| <b>CD133</b>              | AC133, PROM1, Prominin 1, Hematopoietic stem cell antigen                           | 293C3   | 130-090-853<br>(Miltenyi Biotec) |
| <b>CD152</b>              | CTLA-4                                                                              | BNI3    | 555853<br>(BD Pharmingen)        |
| <b>CD166</b>              | ALCAM, KG-CAM, SC-1, BEN, DM-GRASP                                                  | 3A6     | MCA1926F<br>(Bio-Rad)            |
| <b>CD273</b>              | B7DC, Btdc, PDL2, CD273, PD-L2, PDCD1L2, MGC142238, MGC142240, bA574F11.2, PDCD1LG2 | MIH18   | 12-5888-73<br>(eBioscience)      |
| <b>CD274</b>              | B7-H, B7H1, PDL1, PD-L1, PDCD1L1, PDCD1LG1, MGC142294, MGC142296, CD274             | MIH1    | 12-5589-73<br>(eBioscience)      |
| <b>CD279</b>              | PD1, CD279, SLEB2, hPD-1, hPD-L1, PDCD1                                             | MIH4    | 558694<br>(BD Pharmingen)        |
| <b>CD282</b>              | TIL4, CD282, TLR2                                                                   | TL2.1   | 12-9922-42<br>(eBioscience)      |
| <b>HLA-ABC</b>            | HLA-I                                                                               | G46-2.6 | 555553<br>(BD Pharmingen)        |
| <b>HLAII DP<br/>DQ DR</b> | HLA-II                                                                              | WR18    | MCA477PE<br>(Bio-Rad)            |

**Table S1. Panel of human monoclonal antibodies used for the phenotypic characterization by flow cytometry.**

| miRNAs           | Accession    | LogFC  | <i>p</i> -Value | FDR      |
|------------------|--------------|--------|-----------------|----------|
| hsa-miR-155-5p   | MIMAT0000646 | 5.055  | 7.57E-07        | 9.51E-05 |
| hsa-miR-361-3p   | MIMAT0004682 | 4.937  | 7.92E-04        | 1.99E-02 |
| hsa-miR-376a-3p  | MIMAT0000729 | 4.926  | 1.10E-05        | 8.73E-04 |
| hsa-miR-424-3p   | MIMAT0004749 | 4.757  | 1.17E-03        | 2.36E-02 |
| hsa-miR-27a-3p   | MIMAT0000084 | 4.349  | 7.64E-09        | 4.80E-06 |
| hsa-miR-210-3p   | MIMAT0000267 | 4.338  | 5.32E-04        | 1.52E-02 |
| hsa-miR-21-3p    | MIMAT0004494 | 4.031  | 3.07E-05        | 1.75E-03 |
| hsa-miR-490-3p   | MIMAT0002806 | 4.029  | 8.96E-04        | 2.08E-02 |
| hsa-miR-26a-2-3p | MIMAT0004681 | 3.887  | 5.93E-04        | 1.62E-02 |
| hsa-miR-181a-5p  | MIMAT0000256 | 3.756  | 1.11E-05        | 8.73E-04 |
| hsa-miR-221-5p   | MIMAT0004568 | 3.234  | 2.90E-04        | 9.58E-03 |
| hsa-miR-185-5p   | MIMAT0000455 | 3.116  | 3.09E-03        | 4.73E-02 |
| hsa-miR-34a-5p   | MIMAT0000255 | 3.086  | 3.49E-05        | 1.82E-03 |
| hsa-miR-181b-5p  | MIMAT0000257 | 3.064  | 1.24E-04        | 5.20E-03 |
| hsa-miR-30a-3p   | MIMAT0000088 | 2.983  | 2.35E-04        | 8.21E-03 |
| hsa-miR-221-3p   | MIMAT0000278 | 2.804  | 1.33E-05        | 9.29E-04 |
| hsa-miR-148b-3p  | MIMAT0000759 | 2.787  | 1.39E-03        | 2.73E-02 |
| hsa-miR-199a-5p  | MIMAT0000231 | 2.754  | 1.10E-03        | 2.30E-02 |
| hsa-miR-146b-5p  | MIMAT0002809 | 2.585  | 1.04E-04        | 4.64E-03 |
| hsa-miR-29c-3p   | MIMAT0000681 | 2.560  | 2.02E-03        | 3.59E-02 |
| hsa-miR-125a-5p  | MIMAT0000443 | 2.381  | 1.06E-03        | 2.29E-02 |
| hsa-miR-7-5p     | MIMAT0000252 | 2.362  | 4.02E-04        | 1.20E-02 |
| hsa-miR-376c-3p  | MIMAT0000720 | 1.890  | 1.69E-03        | 3.12E-02 |
| hsa-miR-30b-5p   | MIMAT0000420 | 1.851  | 2.15E-03        | 3.64E-02 |
| hsa-miR-199a-3p  | MIMAT0000232 | 1.505  | 3.64E-06        | 3.81E-04 |
| hsa-miR-320d     | MIMAT0006764 | -1.789 | 8.94E-04        | 2.08E-02 |
| hsa-miR-4492     | MIMAT0019027 | -1.911 | 2.06E-03        | 3.59E-02 |
| hsa-miR-625-3p   | MIMAT0004808 | -1.959 | 2.41E-03        | 3.98E-02 |
| hsa-miR-625-5p   | MIMAT0003294 | -2.436 | 4.27E-07        | 6.70E-05 |
| hsa-miR-549a-3p  | MIMAT0003333 | -2.505 | 9.58E-04        | 2.15E-02 |
| hsa-miR-12136    | MIMAT0049032 | -2.579 | 4.13E-05        | 1.99E-03 |
| hsa-miR-483-5p   | MIMAT0004761 | -2.691 | 3.05E-03        | 4.73E-02 |
| hsa-miR-9901     | MIMAT0039321 | -2.710 | 3.23E-04        | 1.01E-02 |
| hsa-miR-4444     | MIMAT0018962 | -2.826 | 1.34E-04        | 5.28E-03 |
| hsa-miR-7704     | MIMAT0030019 | -3.075 | 1.96E-04        | 7.25E-03 |
| hsa-miR-4516     | MIMAT0019053 | -3.188 | 2.98E-05        | 1.75E-03 |
| hsa-miR-5585-3p  | MIMAT0022286 | -3.666 | 3.48E-08        | 1.09E-05 |
| hsa-miR-619-5p   | MIMAT0026622 | -3.941 | 2.90E-07        | 6.08E-05 |
| hsa-miR-642a-3p  | MIMAT0020924 | -3.943 | 1.47E-03        | 2.79E-02 |
| hsa-miR-1-3p     | MIMAT0000416 | -4.093 | 6.45E-04        | 1.69E-02 |

**Table S2. The list of the 40 significantly differentially expressed miRNAs.** miRNA expression level is indicated as log fold change (logFC) between secretomes from endMSCs (n = 3) and endMSCs\* (n = 3). *p* values and Benjamini-Hochberg FDR (False Discovery Rate) adjusted *p* values are shown.

| miRNAs Name     | Assay ID   | Mature miRNA Sequence    | Inflammatory Response GO:0006954 | Other related Categories                                                                                                                                 |
|-----------------|------------|--------------------------|----------------------------------|----------------------------------------------------------------------------------------------------------------------------------------------------------|
| hsa-miR-7-5p    | 483061_mir | UGGAAGACUAGUGAUUUUGUUGUU | ✓                                | Innate Immune Response GO:0045087, Macrophage Differentiation GO:0030225                                                                                 |
| hsa-miR-27a-3p  | 478384_mir | UUCACAGUGGCUAAGUCCGC     | ✓                                | Innate Immune Response GO:0045087, T-helper 17 Cell Differentiation GO:0072538                                                                           |
| hsa-miR-30b-5p  | 478007_mir | UGUAAACAUCCUACACUCAGCU   | ✓                                | Innate Immune Response GO:0045087, Macrophage Differentiation GO:0030225                                                                                 |
| hsa-miR-34a-5p  | 478048_mir | UGGCAGUGUCUUAGCUGGUUGU   | ✓                                | Innate Immune Response GO:0045087, Macrophage Differentiation GO:0030225                                                                                 |
| hsa-miR-125a-5p | 477884_mir | UCCCUGAGACCCUUUAACCUGUGA | ✓                                | Innate Immune Response GO:0045087, Macrophage Differentiation GO:0030225                                                                                 |
| hsa-miR-146b-5p | 483144_mir | UGAGAACUGAAUCCAUAGGCUG   | ✓                                | Innate Immune Response GO:0045087                                                                                                                        |
| hsa-miR-155-5p  | 483064_mir | UUAAUGCUAAUCGUGAUAGGGUU  | ✓                                | Innate Immune Response GO:0045087, Macrophage Differentiation GO:0030225, T-helper 17 Cell Differentiation GO:0072538, T Cell Differentiation GO:0030217 |
| hsa-miR-181a-5p | 477857_mir | AACAUUCAACGCUGUCGGUGAGU  | ✓                                | Innate Immune Response GO:0045087, Macrophage Differentiation GO:0030225, T-helper 17 Cell Differentiation GO:0072538                                    |
| hsa-miR-181b-5p | 478583_mir | AACAUUCAUUGCUGUCGGUGGGU  | ✓                                | Innate Immune Response GO:0045087, Macrophage Differentiation GO:0030225                                                                                 |
| hsa-miR-185-5p  | 477939_mir | UGGAGAGAAAGGCAGUCCUGA    | ✓                                | Innate Immune Response GO:0045087, Macrophage Differentiation GO:0030225, T Cell Differentiation GO:0030217                                              |
| hsa-miR-199a-3p | 477961_mir | ACAGUAGUCUGCACAUUGGUUA   | ✓                                | Innate Immune Response GO:0045087, Macrophage Differentiation GO:0030225                                                                                 |
| hsa-miR-199a-5p | 478231_mir | CCCAGUGUUCAGACUACCUGUUC  | ✓                                | Innate Immune Response GO:0045087, Macrophage Differentiation GO:0030225                                                                                 |
| hsa-miR-210-3p  | 477970_mir | CUGUGCGUGUGACAGCGGCUGA   | ✓                                | Innate Immune Response GO:0045087, T-helper 17 Cell Differentiation GO:0072538                                                                           |
| hsa-miR-221-3p  | 477981_mir | AGCUACAUUGUCUGUGGGUUUC   | ✓                                | Innate Immune Response GO:0045087, Macrophage Differentiation GO:0030225                                                                                 |
| hsa-miR-93-5p   | 478210_mir | CAAAGUGCUGUUCGUGCAGGUAG  | ✗                                | Suitable endogenous control                                                                                                                              |
| hsa-miR-16-5p   | 477860_mir | UAGCAGCACGUAAAUUUGGCG    | ✗                                | Suitable endogenous control                                                                                                                              |

**Table S3. miRNAs name and assays ID of commercial TaqMan™ Advanced miRNA Assay (Applied Biosystems, Thermo Fisher, CA, USA), used for transcriptomic results confirmation.** Additional information about their Gene Ontology (GO) Categories is also provided.
